# Supplementary material
Source: publisher site journal article supplement (https://www.dovepress.com/article/554609)
Supplement: Supplementary file 1 [file 554609_Supplemental%20Methods%20REV1_20251222_submission-ready.docx]

# Supplemental Methods

Interviews were conducted by Jenni Goodsell, BA (Psych), Post Grad Diploma Science (Psych), a female healthcare market researcher from Community and Patient Preference Research (CaPPRe) with over 20 years of experience in conducting focus groups and in-depth interviews.

Prior to study commencement there was no relationship established with participants. Participants were briefed by the researcher, so they understood the goals and reasons for doing the research.

This study used exploratory semi-structured qualitative interviewing methodology. A qualitative discussion guide containing probes was developed to assist the flow of conversation during the interviews and ensure relevant topics and research objectives were covered comprehensively. Due to the exploratory nature of the research, the discussion guide did not require pilot testing prior to commencement of interviews. Interviews were audio and video recorded. The researcher took fieldnotes during the interviews. Interview transcripts were analyzed using thematic analysis (both deductive and inductive) using NVivo, an advanced thematic analysis software that assists researchers to identify common themes and evidence-based insights when examining the large amounts of text generated in qualitative interview transcripts. The deductive approach was developed to include themes that were directly in line with the study objectives and served as an initial structure for organizing the data and guiding the coding scaffold. In parallel, an inductive coding process was used to capture new data-driven insights on patient perspectives that emerged directly from the qualitative interviews. Inductive codes were added when data did not fit the predetermined categories. The final research results were consolidated through both coding streams to produce a comprehensive thematic structure that reflected the lived experiences of people living with obstructive HCM. Jenni Godsell was the lead analyst and responsible for generating the qualitative code frame. Analysis was supported by another CaPPRe qualitative researcher through review of data and validation of the code frame (no coding disagreement occurred between the two researchers) and subsequently conclusions and study insight interpretations.

Participants were interviewed via an online video meeting with only the researcher and participant present. There were no other people present during the interviews besides the participants and researchers. Transcripts were produced digitally but were not returned to participants for comment or correction.

Participants were not invited to provide feedback on findings.
